# Supplementary material for: The ortho-benzyne cation is not planar
Source: Royal Society of Chemistry journal article supplement (doi:10.1039/c7cp08055g), 2018-01-01
Supplement: c7cp08055g1.pdf [file c7cp08055g1.pdf]

## Electronic Supplementary Information to

### **The ortho-Benzyne Cation is Not Planar**

D. Kaiser,<sup>a</sup> E. Reusch,<sup>a</sup> P. Hemberger,<sup>\* b</sup> A. Bodi,<sup>b</sup> E. Welz,<sup>a</sup> B. Engels<sup>\* a</sup> and I. Fischer,<sup>\* a</sup>

<sup>a</sup>Institute of Physical and Theoretical Chemistry, University of Würzburg, Am Hubland, D-97074  
Würzburg, Germany

<sup>b</sup>Laboratory for Femtochemistry and Synchrotron Radiation, Paul Scherrer Institut, CH-5232 Villigen  
PSI, Switzerland

## Table of Contents:

| Contents                                                                                                                                                  | Page    |
|-----------------------------------------------------------------------------------------------------------------------------------------------------------|---------|
| <b>Figure S1:</b> Mass-selected threshold photoelectron spectrum of benzocyclobuten-1,2-dion                                                              | S3      |
| <b>Figure S2:</b> Fitted time-of-flight (TOF) distributions.                                                                                              | S4      |
| <b>Figure S3:</b> Mass-selected threshold photoelectron spectrum of ortho-benzyne with a close-up that shows a small peak at 9.03 eV.                     | S5      |
| <b>Figure S4:</b> ms-TPE spectrum together with a simulation based on the computed ionization energies.                                                   | S6      |
| <b>Figure S5:</b> Optimisation of the o-benzyne cation without symmetry constraints                                                                       | S7      |
| <b>Figure S6:</b> Diagram of all calculated vertical excitation energies at all geometries.                                                               | S8      |
| <b>Table S1:</b> Key features of the equilibrium geometries for ortho-benzyne and the ortho-benzyne cation                                                | S9      |
| <b>Table S2:</b> Results of unrestricted optimisations using various methods                                                                              | S10     |
| <b>Tables S3-5:</b> Vertical excitation energies in the ortho-benzyne cation computed by various methods                                                  | S11-S12 |
| <b>Table S6:</b> Vertical ionisation energies of ortho-benzyne computed by various methods.                                                               | S12     |
| <b>Table S7:</b> Adiabatic ionisation energies of ortho-benzyne computed via a thermochemical cycle                                                       | S13     |
| <b>Table S8-S13:</b> Cartesian Geometries of all obtained stationary points found for ortho-benzyne and the ortho-benzyne cation.                         | S14-16  |
| <b>Table S14:</b> Ionisation energies obtained from a basis set extrapolation                                                                             | S17     |
| <b>Table S15:</b> Comparison of experimentally reported ionization energies. With the exception of the present work all values correspond to vertical IE. | S18     |

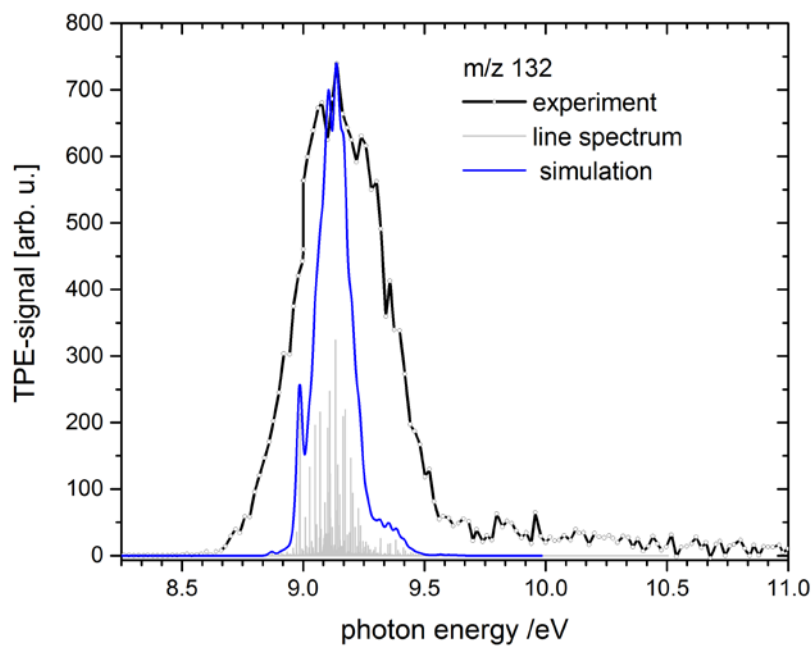

**Figure S1:** Mass-selected threshold photoelectron spectrum of benzocyclobuten-1,2-dion. The photon energy was scanned in 10 meV steps, one point was averaged for 120 s. From the Franck-Condon simulation (blue envelope) we assume an  $IE_{ad}$  of 8.96 eV. An experimental  $IE_{vert}$ =9.23 was reported by Gleiter *et al.*,<sup>1</sup> computations yielded  $IE_{ad}$ =9.03 eV. These literature values are thus in good agreement with our experiments.

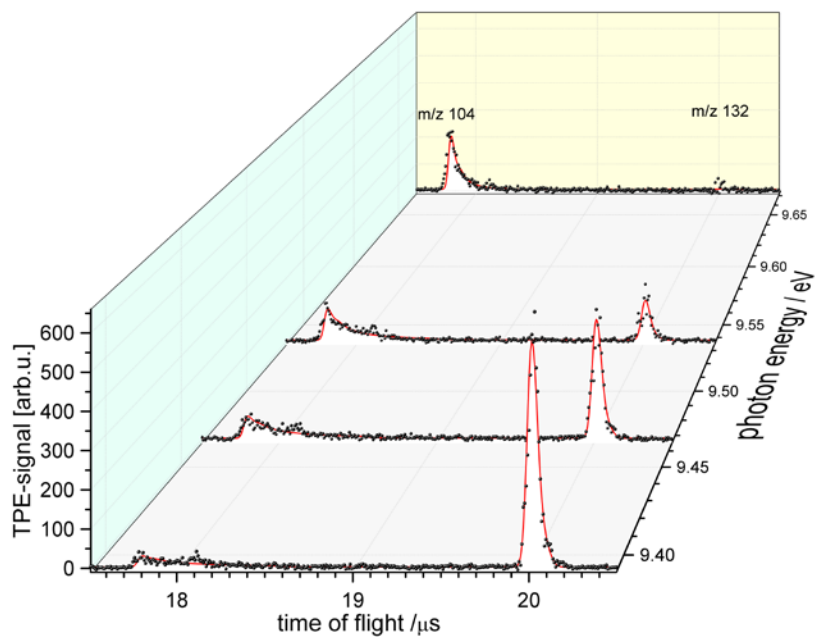

a)

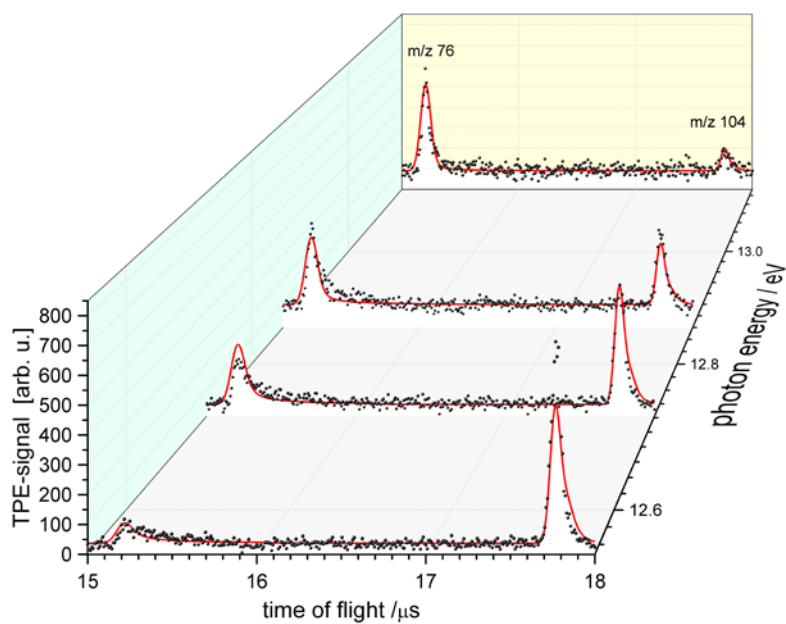

**Figure S2:** The asymmetry in the daughter TOF distributions for a) the first and b) the second dissociation step indicates a slow rate for the sequential dissociative photoionisation of benzocyclobuten-1,2-dion. The red lines show the simultaneous fit of the experimental TOF distributions (black dots). In the upper trace a small signal from a previous experiment is visible at 18.1 μs.

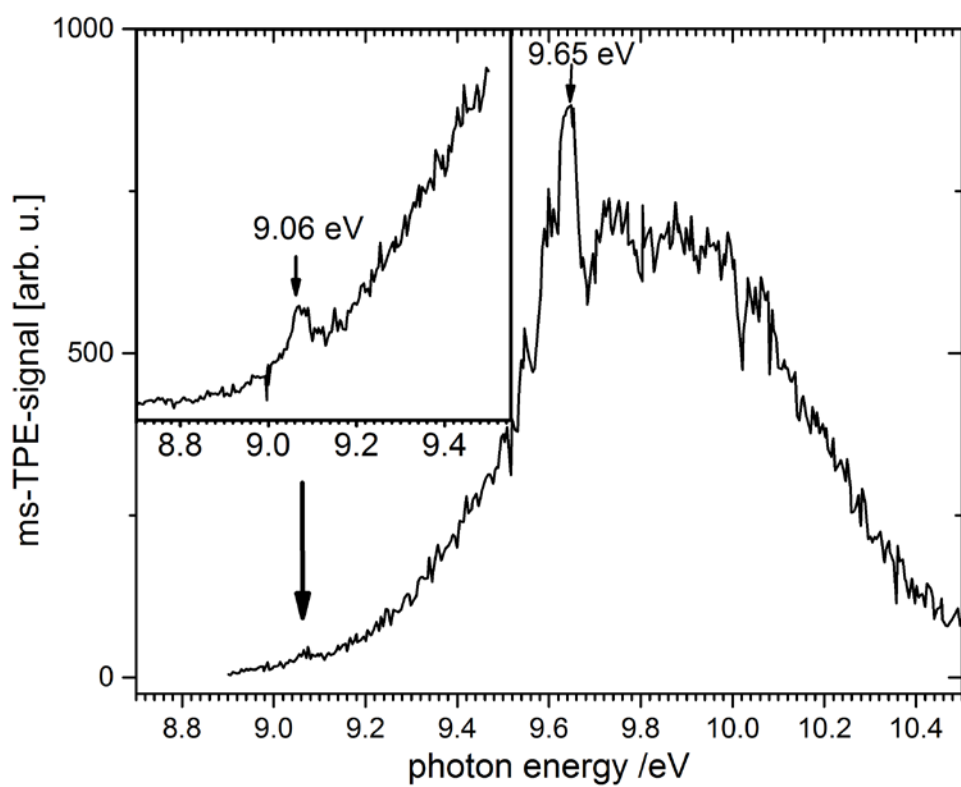

**Figure S3:** Mass-selected threshold photoelectron (ms-TPE) spectrum of ortho-benzyne with a close-up that shows a small peak at 9.03 eV.

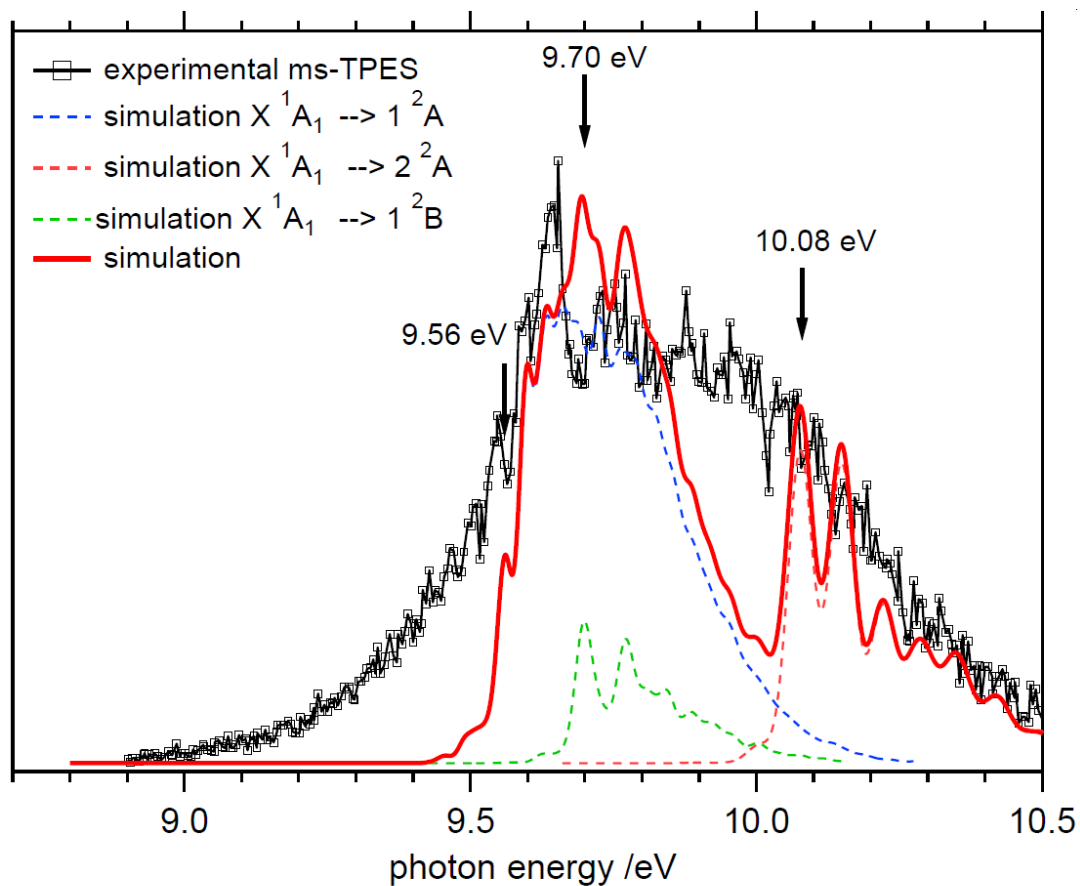

**Figure S4:** ms-TPE spectrum together with a simulation based on the computed ionization energies. It shows that the computed values are slightly too high. When compared with best simulation, given in Figure 7 in the manuscript, error bars of +50/-100 meV are assumed for  $IE_{ad}$  and  $\pm 20$  meV for the transition into the  $1^2B$  state.

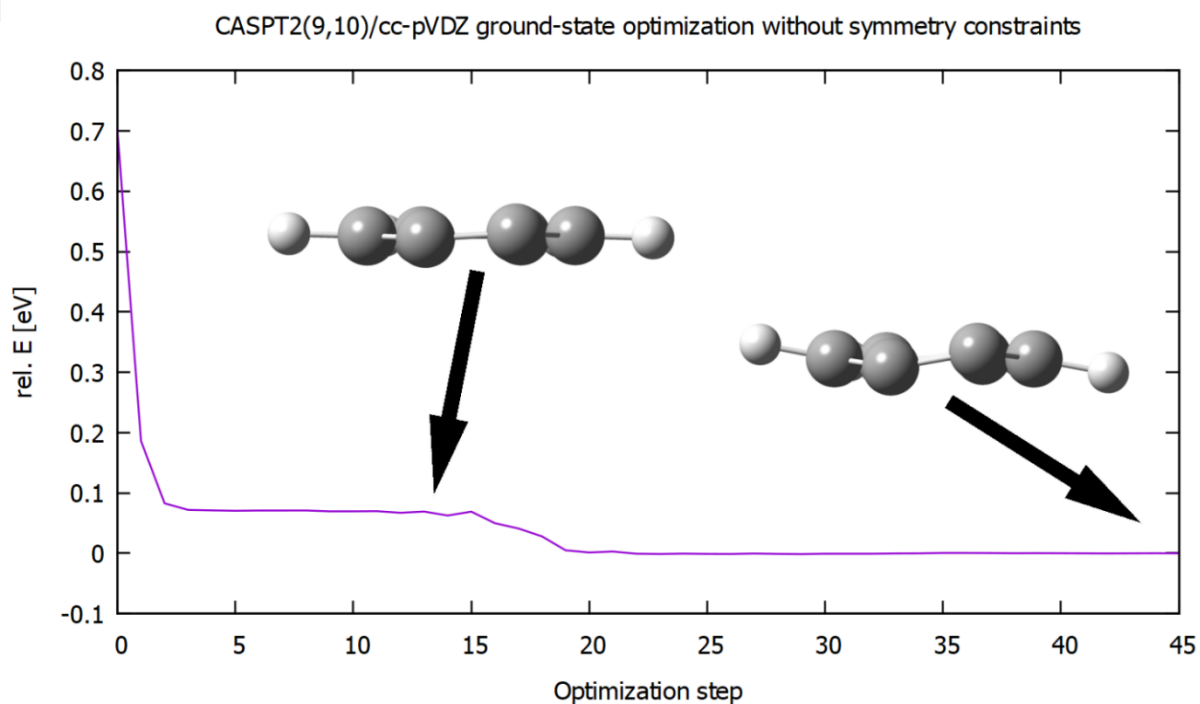

**Figure S5:** Optimisation of the ortho-benzyne cation without symmetry constraints.

Results of a numerical CASPT2(9,10)/cc-pVDZ geometry optimisation without symmetry constraints for the ground-state of the ortho-benzyne cation, starting from the equilibrium geometry of ortho-benzyne at the SCS-CC2/def2-TZVPP level of theory. It is shown how the optimization procedure seems to converge on a planar structure, most likely the equilibrium geometry of the  $1^2B$  state, but then reaches an energetically more favorable geometry with a twisted structure.





**Table S1:** Key parameters for the equilibrium geometries of the ground states of ortho-benzyne and the ortho-benzyne cation, as well as the first three excited states of the ortho-benzyne cation. The numbering of the carbon atoms refers to Figure 2 of the main article.

|                                                   | C <sub>1</sub> - C <sub>2</sub><br>distance | C <sub>2</sub> - C <sub>3</sub><br>distance | C <sub>3</sub> - C <sub>4</sub><br>distance | C <sub>4</sub> - C <sub>5</sub><br>distance | C <sub>1</sub> - C <sub>2</sub> - C <sub>3</sub><br>angle | C <sub>1</sub> - C <sub>2</sub> - C <sub>3</sub> -<br>C <sub>4</sub> dihedral |
|---------------------------------------------------|---------------------------------------------|---------------------------------------------|---------------------------------------------|---------------------------------------------|-----------------------------------------------------------|-------------------------------------------------------------------------------|
| 1 <sup>1</sup> A <sub>1</sub>                     | 1.280 Å                                     | 1.399 Å                                     | 1.419 Å                                     | 1.418 Å                                     | 126.37 °                                                  | 0.0 °                                                                         |
| 1 <sup>2</sup> B (1 <sup>2</sup> B <sub>i</sub> ) | 1.305 Å                                     | 1.394 Å                                     | 1.416 Å                                     | 1.481 Å                                     | 128.26 °                                                  | 0.03 °                                                                        |
| 1 <sup>2</sup> A (1 <sup>2</sup> A <sub>2</sub> ) | 1.279 Å                                     | 1.407 Å                                     | 1.457 Å                                     | 1.393 Å                                     | 124.13 °                                                  | 18.32 °                                                                       |
| 2 <sup>2</sup> A (1 <sup>2</sup> A <sub>i</sub> ) | 1.319 Å                                     | 1.373 Å                                     | 1.438 Å                                     | 1.402 Å                                     | 128.54 °                                                  | 0.00 °                                                                        |
| 2 <sup>2</sup> B                                  | 1.280 Å                                     | 1.409 Å                                     | 1.446 Å                                     | 1.396 Å                                     | 123.93 °                                                  | 19.11 °                                                                       |

**Table S2:** Results of unrestricted optimisations using MP2, SCS-MP2, CC2, SCS-CC2, M06-2X, B3LYP and wB97XD with the cc-pVQZ basis starting from different geometries obtained at the CASPT2(9,10)/cc-pVDZ level of theory for the cation and CASPT2(10,10)/cc-pVDZ for the neutral o-benzyne. All DFT methods predict the skewed geometry to be lower in energy compared to planar geometries. MP2 as well as SCS-MP2 fail to predict the twisted geometry as the ground state. Only SCS-CC2 correctly optimizes to the twisted ground-state geometry from all three starting geometries. Frequency calculations have been run for each optimized structure.  $\Delta E$  refers to energy difference of optimized geometries if two different geometries are yielded.

|         | Optimisation starting from equilibrium geometry of $X^+ \ ^2A$ ( $1 \ ^2A_2$ ) state (twisted)         | Opt. starting from equilibrium geometry of $1 \ ^2B$ ( $1 \ ^2B_1$ ) state (planar)                                                  | Opt. starting from neutral equilibrium geometry (planar)                                                                    |
|---------|--------------------------------------------------------------------------------------------------------|--------------------------------------------------------------------------------------------------------------------------------------|-----------------------------------------------------------------------------------------------------------------------------|
| MP2     | - Twisted geometry<br>- 0 imaginary frequencies<br>- $S^2=0.91$<br>- SOMO = $a_2$                      | - Planar geometry, $\Delta E = -0.09$ eV<br>- 0 imaginary frequencies<br>- $S^2=0.75$<br>- SOMO = $a_1$                              |                                                                                                                             |
| wB97xD  | - Twisted geometry<br>- 0 imaginary frequencies<br>- $S^2=0.77$<br>- SOMO = $a_2$                      | - Planar geometry, $\Delta E = 0.14$ eV<br>- 2 imaginary frequencies ( $b_2, a_2$ )<br>- $S^2=0.76$ ( $b_2, a_2$ )<br>- SOMO = $a_1$ |                                                                                                                             |
| B3LYP   | - Twisted geometry<br>- 0 imaginary frequencies<br>- $S^2=0.76$<br>- SOMO = $a_2$                      | - Planar geometry, $\Delta E = 0.12$ eV<br>- 2 imaginary frequencies ( $b_2, a_2$ )<br>- $S^2=0.77$<br>- SOMO = $a_1$                |                                                                                                                             |
| M06-2X  | - Twisted geometry<br>- 0 imaginary frequencies<br>- $S^2=0.76$<br>- SOMO = $a_2$                      | - Planar geometry, $\Delta E = 0.064$ eV<br>- 1 imaginary frequency ( $b_2$ )<br>- $S^2=0.76$<br>- SOMO = $a_1$                      |                                                                                                                             |
| CC2     | - Twisted geometry<br>- 2 imaginary frequencies ( $a_1, b_2$ )<br>- $S^2 = 0.96$<br>- SOMO = $a_2$     |                                                                                                                                      | - Planar geometry, $\Delta E = 0.12$ eV<br>- 4 imaginary frequencies ( $3 \ b_2, a_2$ )<br>- $S^2 = 0.78$<br>- SOMO = $a_1$ |
| SCS-CC2 | - Twisted geometry<br>- 3 imaginary frequencies ( $2 \ b_2, a_1$ )<br>- $S^2 = 0.95$<br>- SOMO = $a_2$ |                                                                                                                                      |                                                                                                                             |
| SCS-MP2 | - Planar geometry<br>- 4 imaginary frequencies ( $3 \ b_2, a_2$ )<br>- $S^2 = 0.78$<br>- SOMO = $a_1$  |                                                                                                                                      |                                                                                                                             |

**Table S3:** Vertical excitation energies as relative energy differences in eV calculated for the MS-SA-CASPT2(9,10)/cc-pVDZ optimized geometries of the twisted  $X^+ \ ^2A$  ( $1 \ ^2A_2$ ) state of the ortho-benzyne cation, optimized at the CASPT2(9,10)/cc-pVDZ level of theory. All methods employ the cc-pVQZ basis set. In all cases, the ground state is the  $X^+ \ ^2A$  ( $1 \ ^2A_2$ ) state. All values in [eV].

| Vertical excitation from equilibrium geometry of $1 \ ^2A$ ( $1 \ ^2A_2$ ) state |                                   |                                    |
|----------------------------------------------------------------------------------|-----------------------------------|------------------------------------|
|                                                                                  | First excited state ( $1 \ ^2B$ ) | Second excited state ( $2 \ ^2A$ ) |
| wB97xD                                                                           | 0.97                              | 1.07                               |
| B3LYP                                                                            | 0.86                              | 0.75                               |
| M06-2X                                                                           | 1.00                              | 1.22                               |
| CC2                                                                              | 1.08                              | 1.37                               |
| SCS-CC2                                                                          | 1.13                              | 1.35                               |
| ADC(2)                                                                           | 1.06                              | 1.20                               |
| SCS-ADC(2)                                                                       | 1.13                              | 1.35                               |
| SA-UNO-CAS(11,14)                                                                | 1.21                              | 2.43                               |
| SA-UNO-CAS(11,14) + MS-PT2                                                       | 0.60                              | 1.32                               |
| MS-SA-CASPT2(11,14)                                                              | 0.77                              | 1.14                               |

**Table S4:** Vertical excitation energies as relative energy differences in eV calculated for the MS-SA-CASPT2(9,10)/cc-pVDZ optimized geometries of the planar  $1 \ ^2B$  ( $1 \ ^2B_1$ ) state of the o-benzyne cation, optimized at the CASPT2(9,10)/cc-pVDZ level of theory. All methods employ the cc-pVQZ basis set. All values in [eV].

| Vertical excitation from equilibrium geometry of $1 \ ^2B$ ( $1 \ ^2B_1$ ) state |              |                     |                      |
|----------------------------------------------------------------------------------|--------------|---------------------|----------------------|
|                                                                                  | Ground state | First excited state | Second excited state |
| wB97xD                                                                           | $^2A_1$      | 0.16 ( $1 \ ^2B$ )  | 0.64 ( $2 \ ^2A$ )   |
| B3LYP                                                                            | $^2B_1$      | -0.22 ( $2 \ ^2B$ ) | 0.19 ( $3 \ ^2B$ )   |
| M06-2X                                                                           | $^2A_1$      | 0.16 ( $1 \ ^2B$ )  | 0.16 ( $2 \ ^2A$ )   |
| CC2                                                                              | $^2A_1$      | -0.18 ( $1 \ ^2B$ ) | 0.19 ( $2 \ ^2A$ )   |
| SCS-CC2                                                                          | $^2A_1$      | -0.18 ( $1 \ ^2B$ ) | 0.17 ( $2 \ ^2A$ )   |
| ADC(2)                                                                           | $^2A_1$      | -0.31 ( $1 \ ^2B$ ) | 0.09 ( $2 \ ^2A$ )   |
| SCS-ADC(2)                                                                       | $^2A_1$      | -0.30 ( $1 \ ^2B$ ) | 0.09 ( $2 \ ^2A$ )   |
| SA-UNO-CAS(11,14)                                                                | $^2B_1$      | 1.16 ( $1 \ ^2A$ )  | 3.70 ( $2 \ ^2B$ )   |
| SA-UNO-CAS(11,14) + MS-PT2                                                       | $^2B_1$      | 0.30 ( $1 \ ^2A$ )  | 2.72 ( $2 \ ^2B$ )   |
| MS-SA-CASPT2(11,14)                                                              | $^2B_1$      | 0.34 ( $1 \ ^2A$ )  | 0.42 ( $2 \ ^2A$ )   |

**Table S5:** Vertical excitation energies as relative energy differences in eV calculated via MS-SA-CASPT2(9,10)/cc-pVDZ of the ortho-benzyne cation at the equilibrium geometry of the  $1^1A_1$  neutral o-benzyne, optimized at the CASPT2(10,10)/cc-pVDZ level of theory. All methods employ the cc-pVQZ basis set. In all cases, the ground state is the  $X^+ \ ^2A$  ( $1^2A_2$ ) state. All values in [eV].

| Vertical excitation of the cation from the equilibrium geometry of $1^1A$ ( $1^1A_1$ ) state of the neutral molecule |                                |                                 |
|----------------------------------------------------------------------------------------------------------------------|--------------------------------|---------------------------------|
|                                                                                                                      | First excited state ( $1^2B$ ) | Second excited state ( $2^2A$ ) |
| wB97xD                                                                                                               | 0.31                           | 0.33                            |
| B3LYP                                                                                                                | 0.04                           | 0.08                            |
| M06-2X                                                                                                               | 0.10                           | 0.42                            |
| CC2                                                                                                                  | -0.03                          | -0.07                           |
| SCS-CC2                                                                                                              | -0.02                          | -0.10                           |
| ADC(2)                                                                                                               | -0.17                          | -0.18                           |
| SCS-ADC(2)                                                                                                           | -0.15                          | -0.20                           |
| SA-UNO-CAS(11,14)                                                                                                    | 0.55                           | -3.51                           |
| SA-UNO-CAS(11,14) + MS-PT2                                                                                           | 0.16                           | 1.83                            |
| MS-SA-CASPT2(11,14)                                                                                                  | 0.00                           | 0.36                            |

**Table S6:** Vertical ionisation energies at the geometry of neutral ortho-benzyne as a function of computational method. For all methods Dunning's cc-pVQZ basis set was used. For the reference values (assumed to be CASPT2(11,14)/cc-pVQZ) see the main article.

| Method                         | wB97xD | M062X | B3LYP | CC2   | SCS-CC2 | SCS-MP2 | MP2   | UNO-CAS + PT2 |
|--------------------------------|--------|-------|-------|-------|---------|---------|-------|---------------|
| $IE_{\text{vert}} / \text{eV}$ | 9.59   | 9.69  | 9.61  | 10.18 | 10.15   | 10.24   | 10.29 | 10.16         |

**Table S7:** Adiabatic ionization energy derived by a thermochemical cycle. The heat of reaction  $\Delta_R H$  (0K) for benzocyclobutenedione  $\rightarrow$  ortho-benzyne + 2 CO was computed by various methods. The value was then subtracted from the appearance energy  $AE_{0K}(C_8H_4O_2, C_6H_4^+) = 12.14$  eV obtained from the breakdown diagram given in Figure 6.

|           | Dion     | -> | 2 CO     | + | benzyne  | $\Delta_r H_{0K} / \text{eV}$ |       |       |
|-----------|----------|----|----------|---|----------|-------------------------------|-------|-------|
| G4(0K)    | -457.454 |    | -113.289 |   | -230.788 | 2.384                         |       |       |
| QB3(0K)   | -456.942 |    | -113.182 |   | -230.485 | 2.534                         |       |       |
| APNO(0K)  | -457.547 |    | -113.312 |   | -230.83  | 2.529                         |       |       |
| W1(0K)    | -457.732 |    | -113.373 |   | -230.896 | 2.457                         | avg   | stdev |
| W1BD (0K) | -457.732 |    | -113.373 |   | -230.895 | 2.489                         | 2.48  | 0.07  |
|           |          |    |          |   |          | onset(exp)                    | 12.14 | 0.10  |
|           |          |    |          |   |          | IP                            | 9.66  | 0.12  |

**Table S8:** Cartesian coordinates for the  $1^1A_1$  equilibrium geometry of the neutral ortho-benzyne obtained at the CASPT2(10,10)/cc-pVDZ level of theory. The geometry was verified as a true minimum by a numerical CASPT2(10,10)/cc-pVDZ hessian calculation.

|   | X in Å  | Y in Å | Z in Å  |
|---|---------|--------|---------|
| C | 0.6402  | 0.000  | -1.5529 |
| C | -0.6402 | 0.000  | -1.5529 |
| C | 1.4695  | 0.000  | -0.4268 |
| C | -1.4695 | 0.000  | -0.4268 |
| C | -0.7091 | 0.000  | 0.7718  |
| C | 0.7091  | 0.000  | 0.7718  |
| H | 1.2362  | 0.000  | 1.7323  |
| H | -1.2362 | 0.000  | 1.7323  |
| H | -2.5621 | 0.000  | -0.4258 |
| H | 2.5621  | 0.000  | -0.4258 |

**Table S9:** Cartesian coordinates for the  $1^2B$  ( $1^2B_1$ ) equilibrium geometry of the ortho-benzyne cation obtained at the CASPT2(9,10)/cc-pVDZ level of theory. The geometry was verified as a true minimum by a numerical CASPT2(9,10)/cc-pVDZ hessian calculation.

|   | X in Å  | Y in Å  | Z in Å  |
|---|---------|---------|---------|
| C | 0.6525  | 0.0001  | -1.5223 |
| C | -0.6525 | -0.0001 | -1.5223 |
| C | 1.5157  | -0.0001 | -0.4278 |
| C | -1.5157 | 0.0001  | -0.4278 |
| C | -0.7406 | 0.0001  | 0.7568  |
| C | 0.7406  | -0.0001 | 0.7568  |
| H | 1.2408  | 0.0005  | 1.7326  |
| H | -1.2408 | -0.0005 | 1.7326  |
| H | -2.6063 | -0.0002 | -0.4408 |
| H | 2.6063  | 0.0002  | -0.4408 |

**Table S10:** Cartesian coordinates for the  $1^2A$  ( $1^2A_2$ ) equilibrium geometry of the o-benzyne cation obtained at the CASPT2(9,10)/cc-pVDZ level of theory. The geometry was verified as a true minimum by a numerical CASPT2(9,10)/cc-pVDZ hessian calculation.

|   | X in Å  | Y in Å  | Z in Å  |
|---|---------|---------|---------|
| C | 0.6261  | -0.1289 | -1.5747 |
| C | -0.6261 | 0.1289  | -1.5747 |
| C | 1.4493  | -0.0471 | -0.4368 |
| C | -1.4493 | 0.0471  | -0.4368 |

|   |         |         |         |
|---|---------|---------|---------|
| C | -0.6941 | 0.0559  | 0.8095  |
| C | 0.6941  | -0.0559 | 0.8095  |
| H | 1.2466  | -0.0704 | 1.7532  |
| H | -1.2466 | 0.0704  | 1.7532  |
| H | -2.5334 | -0.1087 | -0.4527 |
| H | 2.5334  | 0.1087  | -0.4527 |

**Table S11:** Cartesian coordinates for the  $2^2A$  ( $1^2A_1$ ) equilibrium geometry of the o-benzyne cation obtained at the CASPT2(9,10)/cc-pVDZ level of theory. The geometry was verified as a true minimum by a numerical SA-MS-CASPT2(9,10)/cc-pVDZ hessian calculation.

|   | X in Å  | Y in Å | Z in Å  |
|---|---------|--------|---------|
| C | 0.6594  | 0.0000 | -1.5026 |
| C | -0.6594 | 0.0000 | -1.5026 |
| C | 1.5149  | 0.0000 | -0.4287 |
| C | -1.5149 | 0.0000 | -0.4287 |
| C | -0.7010 | 0.0000 | 0.7565  |
| C | 0.7010  | 0.0000 | 0.7565  |
| H | 1.2423  | 0.0000 | 1.7097  |
| H | -1.2423 | 0.0000 | 1.7097  |
| H | -2.6070 | 0.0000 | -0.4365 |
| H | 2.6070  | 0.0000 | -0.4365 |

**Table S12:** Cartesian coordinates for the  $2^2B$  equilibrium geometry of the o-benzyne cation obtained at the SA-MS-CASPT2(9,10)/cc-pVDZ level of theory. The geometry was verified as a true minimum by a numerical SA-MS-CASPT2(9,10)/cc-pVDZ Hessian calculation.

|   | X in Å  | Y in Å  | Z in Å  |
|---|---------|---------|---------|
| C | 0.6243  | -0.1383 | -1.5751 |
| C | -0.6272 | 0.1321  | -1.5779 |
| C | 1.4479  | -0.0495 | -0.4304 |
| C | -1.4454 | 0.0498  | -0.4341 |
| C | -0.6948 | 0.0595  | 0.8012  |
| C | 0.6965  | -0.0560 | 0.8064  |
| H | 1.2431  | -0.0770 | 1.7548  |
| H | -1.2441 | 0.0718  | 1.7488  |
| H | -2.5305 | -0.1102 | -0.4451 |
| H | 2.5302  | 0.1178  | -0.4516 |

**Table S13:** Cartesian coordinates for the saddle point identified on the potential energy surface of the  $1^2B$  ( $1^2B_1$ ) state of the ortho-benzyne cation, obtained at the CASPT2(9,10)/cc-pVDZ level of theory. The geometry was verified as a first order saddle point by a numerical MS-SA-CASPT2(9,10)/cc-pVDZ hessian calculation.

|   | X in Å  | Y in Å  | Z in Å |
|---|---------|---------|--------|
| C | -0.1071 | -1.3222 | 0.0000 |
| C | -1.2633 | -0.6884 | 0.0000 |
| C | 1.1986  | -0.9712 | 0.0000 |
| C | -1.3262 | 0.6984  | 0.0000 |
| C | -0.0127 | 1.2564  | 0.0000 |
| C | 1.1599  | 0.4818  | 0.0000 |
| H | 2.1467  | 0.9586  | 0.0000 |
| H | 0.0761  | 2.3473  | 0.0000 |
| H | -2.2487 | 1.2854  | 0.0000 |
| H | 2.1130  | -1.5667 | 0.0000 |

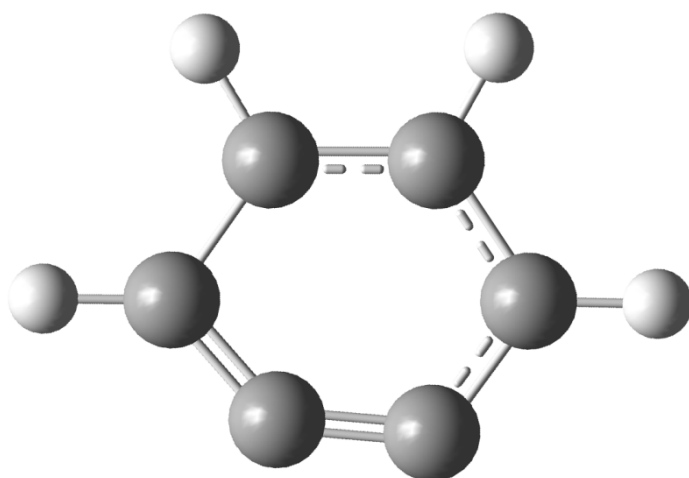



**Table S14:** Vertical ( $IE_{\text{vert}}$ ) and adiabatic ( $IE_{\text{ad}}$ ) ionisation energies of **1** as well as  $IE_{\text{ad}}$  including zero point vibrational energy, obtained from a basis-set-limit extrapolation using cc-pVQZ and cc-pV5Z results.<sup>2</sup>

|                                          | <b>1 <sup>2</sup>A</b><br>( <b>1 <sup>2</sup>A<sub>2</sub></b> ) | <b>2 <sup>2</sup>A</b><br>( <b>1 <sup>2</sup>A<sub>1</sub></b> ) | <b>1 <sup>2</sup>B</b><br>( <b>1 <sup>2</sup>B<sub>1</sub></b> ) | <b>2 <sup>2</sup>B</b> |
|------------------------------------------|------------------------------------------------------------------|------------------------------------------------------------------|------------------------------------------------------------------|------------------------|
| <b><math>IE_{\text{vert}}</math></b>     | 9.80 eV                                                          | 10.16 eV                                                         | 9.85 eV                                                          | 12.03 eV               |
| <b><math>IE_{\text{ad}}</math></b>       | 9.65 eV                                                          | 10.09 eV                                                         | 9.81 eV                                                          | 11.99 eV               |
| <b><math>IE_{\text{ad}}</math> (ZPE)</b> | 9.60 eV                                                          | 10.12 eV                                                         | 9.73 eV                                                          | 12.03 eV               |

**Table S15:** Comparison of experimentally reported ionization energies. With the exception of the present work all values correspond to vertical IE.

| Source                                 | Method                                    | IE /eV                  |
|----------------------------------------|-------------------------------------------|-------------------------|
| Fisher & Lossing, 1963 <sup>3</sup>    | MS                                        | 9.5                     |
| Grützmacher et al, 1967 <sup>4</sup>   | MS                                        | 9.5                     |
| Genzel & Osberghaus, 1967 <sup>5</sup> | MS                                        | 9.5                     |
| Cited via <sup>6</sup>                 |                                           |                         |
| Dewar and Tien, 1985 <sup>7</sup>      | PES                                       | 9.24                    |
|                                        |                                           | 9.75                    |
|                                        |                                           | 9.87                    |
| Schulz & Schweig, 1988 <sup>8</sup>    | PES                                       | 9.23                    |
| Cited via <sup>6</sup>                 |                                           | 9.41                    |
|                                        |                                           | 9.70                    |
| Guo & Grabowski, 1991 <sup>9</sup>     | Ion-molecule rxn/<br>thermochemical cycle | 9.03                    |
| Zhang and Chen, 1992 <sup>10</sup>     | PES                                       | 9.03                    |
|                                        |                                           | 9.77                    |
| Werstiuk et al, 1995 <sup>11</sup>     | PES                                       | 9.7                     |
| Chrostowska et al, 2010 <sup>6</sup>   | PES                                       | 9.65                    |
| This work                              | TPES                                      | 9.51 (X <sup>2</sup> A) |
|                                        |                                           | 9.64 (1 <sup>2</sup> B) |
|                                        |                                           | 9.89 (2 <sup>2</sup> A) |

MS=Mass Spectrometry, PES=Photoelectron Spectroscopy, TPES=Threshold PES

## References:

1. R. Gleiter, P. Schang and G. Seitz, *Chem. Phys. Lett.*, 1978, **55**, 144.
2. A. Halkier, T. Helgaker, P. Jørgensen, W. Klopper, H. Koch, J. Olsen and A. K. Wilson, *Chem. Phys. Lett.*, 1998, **285**, 243.
3. I. P. Fisher and F. P. Lossing, *J. Am. Chem. Soc.*, 1963, **85**, 1018.
4. H.-F. Grützmacher and J. Lohmann, *Liebigs Ann. Chem.*, 1967, **705**, 81.
5. H. Genzel and O. Osberghaus, *Z. Naturforsch. A*, 1967, **22**, 331.
6. A. Chrostowska, G. Pfister-Guillouzo, F. Gracian and C. Wentrup, *Aust. J. Chem.*, 2010, **63**, 1084.
7. M. S. Dewar and T.-P. Tien, *Chem. Commun.*, 1985, 1243.
8. R. Schulz and A. Schweig, in *Structure and Reactivity*, eds. J. F. Liebman und A. Greenberg, VCH, Weinheim, 1988, pp. 289.
9. Y. Guo and J. J. Grabowski, *J. Am. Chem. Soc.*, 1991, **113**, 5923.
10. X. Zhang and P. Chen, *J. Am. Chem. Soc.*, 1992, **114**, 3147.
11. N. H. Werstiuk, C. D. Roy and J. Ma, *Can. J. Chem.*, 1995, **73**, 146.
